# Supplementary material
Source: MDPI journal article supplement (https://www.mdpi.com/2073-4433/13/2/238)
Supplement: s1 [file s1]

## Supplementary Materials:

# Compounding Effects of Fluvial Flooding and Storm Tides on Coastal Flooding Risk in the Coastal-Estuarine Region of Southeastern China

Weiwei Lu <sup>1,2</sup>, Lihua Tang <sup>2</sup>, Dawen Yang <sup>2,\*</sup>, Heng Wu <sup>2</sup> and Zhiwu Liu <sup>1</sup>

**Table S1.** Marginal distribution distributions in McVAT.

| Name                      | Mathematical Description                                                                                                                                                                                        | Parameter                                                                                |
|---------------------------|-----------------------------------------------------------------------------------------------------------------------------------------------------------------------------------------------------------------|------------------------------------------------------------------------------------------|
| Beta                      | $F(x) = \frac{\int_0^x t^{\alpha_1-1} (1-t)^{\alpha_2-1} dt}{\int_0^1 t^{\alpha_1-1} (1-t)^{\alpha_2-1} dt}$                                                                                                    | $\alpha_1$ : First shape parameter<br>$\alpha_2$ : Second shape parameter                |
| Birnbaum-Saunders         | $F(x) = \frac{1}{2\pi} \exp\left(-\frac{x^2}{2}\right) \left[ \frac{1}{\kappa} \left( \sqrt{\frac{x}{\alpha}} - \sqrt{\frac{\alpha}{x}} \right) \right]$                                                        | $\alpha$ : scale parameter;<br>$\kappa$ : shape parameter                                |
| Exponential               | $F(x) = 1 - \exp\left(-\frac{(x - \kappa)x}{\alpha}\right), x \geq \kappa$                                                                                                                                      | $\alpha$ : scale parameter;<br>$\kappa$ : shape parameter                                |
| Extreme value             | $F(x) = 1 - \exp\left(-\exp\left(\frac{x - \xi}{\alpha}\right)\right)$                                                                                                                                          | $\xi$ : location parameter;<br>$\alpha$ : scale parameter                                |
| Gamma                     | $F(x) = \frac{\alpha^{-\kappa}}{\Gamma(\kappa)} \int_0^x t^{\kappa-1} e^{-t/\alpha} dt, x > 0$                                                                                                                  | $\alpha$ : scale parameter;<br>$\kappa$ : shape parameter                                |
| Generalized extreme value | $F(x) = \exp\left(-\exp\left(\kappa^{-1} \ln\left(1 - \frac{\kappa(x - \xi)}{\alpha}\right)\right)\right), \kappa \neq 0$                                                                                       | $\xi$ : location parameter;<br>$\alpha$ : scale parameter;<br>$\kappa$ : shape parameter |
|                           | $F(x) = \exp\left(-\exp\left(-\frac{x - \xi}{\alpha}\right)\right), \kappa = 0$                                                                                                                                 |                                                                                          |
| Generalized pareto        | $F(x) = 1 - \exp\left(\kappa^{-1} \ln\left(1 - \frac{\kappa(x - \xi)}{\alpha}\right)\right), \kappa \neq 0$                                                                                                     | $\xi$ : location parameter;<br>$\alpha$ : scale parameter;<br>$\kappa$ : shape parameter |
|                           | $F(x) = 1 - \exp\left(-\frac{x - \xi}{\alpha}\right), \kappa = 0$                                                                                                                                               |                                                                                          |
| Inverse Gaussian          | $F(x) = \frac{1}{2} \left( 1 + \operatorname{erf}\left(\sqrt{\frac{\alpha}{2x}} \left(\frac{x}{\xi} - 1\right)\right) \right) +$                                                                                | $\xi$ : location parameter;<br>$\alpha$ : scale parameter;                               |
|                           | $\frac{1}{2} e^{2\alpha/\xi} \left( 1 - \operatorname{erf}\left(\sqrt{\frac{\alpha}{2x}} \left(\frac{x}{\xi} + 1\right)\right) \right) \quad \operatorname{erf}(x) = \frac{1}{\sqrt{\pi}} \int_0^x e^{-t^2} dt$ |                                                                                          |
| Logistic                  | $F(x) = \frac{1}{1 + \exp\left(-\frac{(x - \xi)}{\alpha}\right)}$                                                                                                                                               | $\xi$ : location parameter;<br>$\alpha$ : scale parameter;                               |
| Log-logistic              | $F(x) = \frac{1}{\sigma} \frac{1}{x} \frac{e^z}{(1 + e^z)^2}, z = \frac{\log(x) - \mu}{\sigma}$                                                                                                                 | $\mu$ : mean of logarithmic values;<br>$\alpha$ : scale parameter of logarithmic values; |

|                  |                                                                                                                                                                                                                                                                                                                                         |                                                                                          |
|------------------|-----------------------------------------------------------------------------------------------------------------------------------------------------------------------------------------------------------------------------------------------------------------------------------------------------------------------------------------|------------------------------------------------------------------------------------------|
| Lognormal        | $F(x) = \frac{1}{2} + \frac{1}{\sqrt{\pi}} \int_0^{\frac{\ln(x)-\xi}{\alpha}} e^{-t^2} dt$                                                                                                                                                                                                                                              | $\xi$ : location parameter;<br>$\alpha$ : scale parameter;                               |
| Nakagami         | $F(x) = \frac{\int_0^{\kappa x^2/\alpha} t^{\kappa-1} e^{-t} dt}{\int_0^\infty t^{\kappa-1} e^{-t} dt}$                                                                                                                                                                                                                                 | $\alpha$ : scale parameter;<br>$\kappa$ : shape parameter                                |
| Normal           | $F(x) = \frac{1}{\alpha\sqrt{2\pi}} \int_{-\infty}^x \exp\left(-\left(\frac{(x-\xi)^2}{2\alpha^2}\right)\right) dx$                                                                                                                                                                                                                     | $\xi$ : location parameter;<br>$\alpha$ : scale parameter                                |
| Rayleigh         | $F(x) = 1 - \exp\left(-\frac{x^2}{2\alpha^2}\right)$                                                                                                                                                                                                                                                                                    | $\alpha$ : scale parameter                                                               |
| Rician           | $F(x) = 1 - \left( \int_{x/\alpha}^\infty t \exp\left(-\left(t^2 + (v/\alpha)^2\right)/2\right) \sum_{k=0}^\infty \frac{(vt/2\alpha)^{2k}}{(k!)^2} dt \right)$                                                                                                                                                                          | $v$ : Noncentrality parameter<br>$\alpha$ : scale parameter                              |
| T location-scale | $F(x) = \frac{1}{2} + \frac{1}{2} \frac{\int_0^{y^2/(\kappa+y^2)} t^{-1/2} (1-t)^{\kappa/2-1} dt}{\int_0^1 t^{-1/2} (1-t)^{\kappa/2-1} dt}, x \geq 0$ $F(x) = \frac{1}{2} - \frac{1}{2} \frac{\int_0^{y^2/(\kappa+y^2)} t^{-1/2} (1-t)^{\kappa/2-1} dt}{\int_0^1 t^{-1/2} (1-t)^{\kappa/2-1} dt}, x < 0 \quad y = \frac{x-\xi}{\alpha}$ | $\xi$ : location parameter;<br>$\alpha$ : scale parameter;<br>$\kappa$ : shape parameter |
| Weibull          | $F(x) = 1 - \exp\left(-\left(\frac{x}{\alpha}\right)^\kappa\right), x \geq 0$ $F(x) = 0, x < 0$                                                                                                                                                                                                                                         | $\alpha$ : scale parameter;<br>$\kappa$ : shape parameter                                |

Table S2. Goodness-of-fit tests of marginal distribution in the univariate analysis.

| Coastal-Estuarine Region | River Discharge           |      |       |         | Sea Level          |      |       |         |
|--------------------------|---------------------------|------|-------|---------|--------------------|------|-------|---------|
|                          | Best Distribution         | AIC  | NSE   | p_value | Best Distribution  | AIC  | NSE   | p-Value |
| Bozhiao                  | Generalized extreme value | 1520 | 0.986 | 0.501   | Rayleigh           | -123 | 0.987 | 0.657   |
| Hecheng                  | Generalized extreme value | 1714 | 0.983 | 0.603   | T location-scale   | -145 | 0.969 | 0.264   |
| Baita                    | Generalized extreme value | 1708 | 0.987 | 0.571   | Gamma              | -146 | 0.991 | 0.516   |
| Yangzhongban             | Generalized extreme value | 1529 | 0.986 | 0.523   | Birnbaum-Saunders  | -199 | 0.995 | 0.886   |
| Shilong                  | Generalized extreme value | 1381 | 0.974 | 0.395   | Logistic           | -136 | 0.998 | 0.999   |
| Punan                    | Generalized extreme value | 1552 | 0.994 | 0.880   | Gamma              | -208 | 0.997 | 0.990   |
| Zhengdian                | Generalized extreme value | 1429 | 0.980 | 0.426   | Gamma              | -159 | 0.997 | 0.975   |
| Dongqiaoyuan             | Generalized extreme value | 957  | 0.988 | 0.543   | Logistic           | -92  | 0.995 | 0.981   |
| Shuangjie                | Generalized extreme value | 996  | 0.973 | 0.511   | Inverse Gaussian   | -90  | 0.986 | 0.629   |
| Huazhou                  | Generalized extreme value | 1021 | 0.981 | 0.632   | Inverse Gaussian   | -96  | 0.973 | 0.471   |
| Changle                  | Generalized extreme value | 1573 | 0.991 | 0.725   | Logistic           | -194 | 0.984 | 0.405   |
| Luwu                     | Generalized extreme value | 1418 | 0.978 | 0.399   | Logistic           | -181 | 0.995 | 0.942   |
| Longtang                 | Generalized extreme value | 1083 | 0.987 | 0.829   | Generalized pareto | -93  | 0.975 | 0.240   |
| Jiaji                    | Inverse Gaussian          | 1117 | 0.973 | 0.277   | Nakagami           | -74  | 0.991 | 0.974   |
| Baoqiao                  | Generalized extreme value | 1128 | 0.977 | 0.511   | Inverse Gaussian   | -106 | 0.983 | 0.651   |

**Table S3.** Goodness-of-fit tests of Copula function in the bivariate analysis.

| Coastal-Estuarine Region | Candidate Copulas         | AIC         | <i>p</i> -Value |
|--------------------------|---------------------------|-------------|-----------------|
| Bozhiao                  | Gaussian                  | -689        | <b>0.444</b>    |
|                          | Clayton                   | -693        | 0.037           |
|                          | Frank                     | -691        | <b>0.476</b>    |
|                          | Gumbel                    | -672        | <b>0.558</b>    |
|                          | Ali-Mikhail-Haq           | <b>-696</b> | <b>0.063</b>    |
|                          | Joe                       | -655        | <b>0.306</b>    |
|                          | Farlie-Gumbel-Morgenstern | -694        | <b>0.600</b>    |
|                          | Plackett                  | -688        | <b>0.362</b>    |
|                          | Galambos                  | -672        | <b>0.474</b>    |
| Baita                    | Gaussian                  | -790        | <b>0.347</b>    |
|                          | Clayton                   | -781        | <b>0.087</b>    |
|                          | Frank                     | -796        | <b>0.197</b>    |
|                          | Gumbel                    | -773        | <b>0.387</b>    |
|                          | Ali-Mikhail-Haq           | -793        | <b>0.088</b>    |
|                          | Joe                       | -756        | <b>0.231</b>    |
|                          | Farlie-Gumbel-Morgenstern | <b>-801</b> | <b>0.437</b>    |
|                          | Plackett                  | -793        | <b>0.169</b>    |
|                          | Galambos                  | -774        | <b>0.304</b>    |
| Dongqiaoyuan             | Gaussian                  | -468        | <b>0.442</b>    |
|                          | Clayton                   | <b>-479</b> | <b>0.511</b>    |
|                          | Frank                     | -467        | <b>0.407</b>    |
|                          | Gumbel                    | -457        | <b>0.207</b>    |
|                          | Ali-Mikhail-Haq           | -476        | <b>0.541</b>    |
|                          | Joe                       | -448        | 0.021           |
|                          | Farlie-Gumbel-Morgenstern | -468        | <b>0.488</b>    |
|                          | Plackett                  | -467        | <b>0.299</b>    |
|                          | Galambos                  | -457        | <b>0.116</b>    |
| Luwu                     | Gaussian                  | -684        | <b>0.2258</b>   |
|                          | Clayton                   | <b>-702</b> | <b>0.8982</b>   |
|                          | Frank                     | -684        | <b>0.1668</b>   |
|                          | Gumbel                    | -673        | <b>0.0684</b>   |
|                          | Ali-Mikhail-Haq           | -690        | <b>0.4222</b>   |
|                          | Joe                       | -666        | 0.0064          |
|                          | Farlie-Gumbel-Morgenstern | -684        | <b>0.1624</b>   |
|                          | Plackett                  | -684        | <b>0.1294</b>   |
|                          | Galambos                  | -673        | 0.0292          |
| Baoqiao                  | Gaussian                  | -421        | <b>0.235</b>    |
|                          | Clayton                   | <b>-435</b> | <b>0.681</b>    |
|                          | Frank                     | -423        | <b>0.158</b>    |
|                          | Gumbel                    | -411        | <b>0.081</b>    |
|                          | Ali-Mikhail-Haq           | -434        | <b>0.486</b>    |
|                          | Joe                       | -400        | 0.014           |
|                          | Farlie-Gumbel-Morgenstern | -422        | <b>0.555</b>    |
|                          | Plackett                  | -423        | <b>0.124</b>    |
|                          | Galambos                  | -410        | 0.046           |

*Note:* The number in bold in “AIC” column represents the corresponding copula is the best copula; The number in bold in “*p*-Value” column represents the corresponding copula passed the CM test at 95 confidence level.

**Table S4.** The best fitted Copula function in 5 coastal-estuarine regions.

| Coastal-Estuarine Region | Best Fitted Copula        | Equations                                                                                                   |
|--------------------------|---------------------------|-------------------------------------------------------------------------------------------------------------|
| Bozhiao                  | Ali-Mikhail-Haq           | $C(u_1, u_2; \theta) = \prod_{i=1}^2 u_i / (1 - \theta \prod_{i=1}^2 (1 - u_i)), \theta = 0.849$            |
| Baita                    | Farlie-Gumbel-Morgenstern | $C(u_1, u_2; \theta) = \prod_{i=1}^2 u_i \left[ 1 + \theta \prod_{i=1}^2 (1 - u_i) \right], \theta = 0.991$ |
| Dongqiaoyuan             | Clayton                   | $C(u_1, u_2; \theta) = \max \left( \sum_{i=1}^2 u_i^{-\theta} - 1, 0 \right)^{-1/\theta}, \theta = 0.489$   |
| Luwu                     | Clayton                   | $C(u_1, u_2; \theta) = \max \left( \sum_{i=1}^2 u_i^{-\theta} - 1, 0 \right)^{-1/\theta}, \theta = 0.362$   |
| Baoqiao                  | Clayton                   | $C(u_1, u_2; \theta) = \max \left( \sum_{i=1}^2 u_i^{-\theta} - 1, 0 \right)^{-1/\theta}, \theta = 0.813$   |

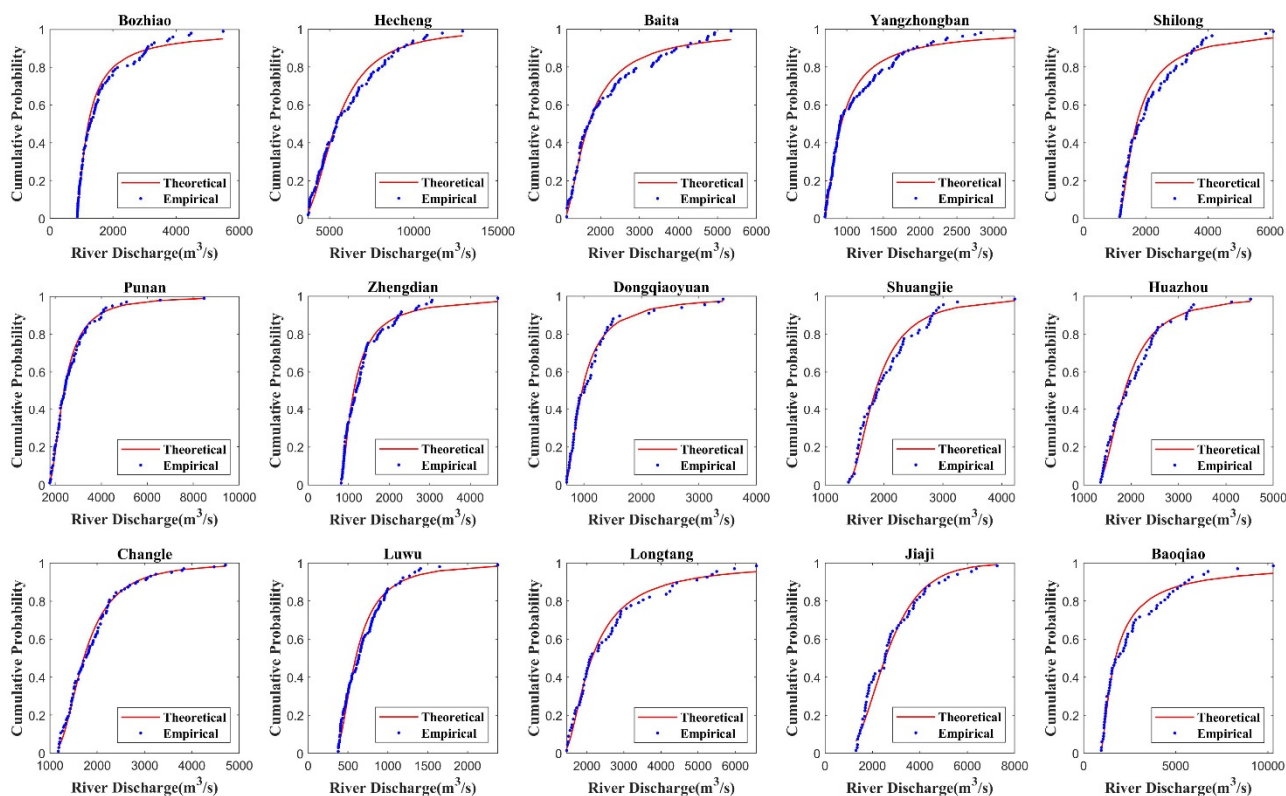**Figure S1.** Empirical distribution functions (blue markers) and theoretical distribution function (red lines) of river discharge.

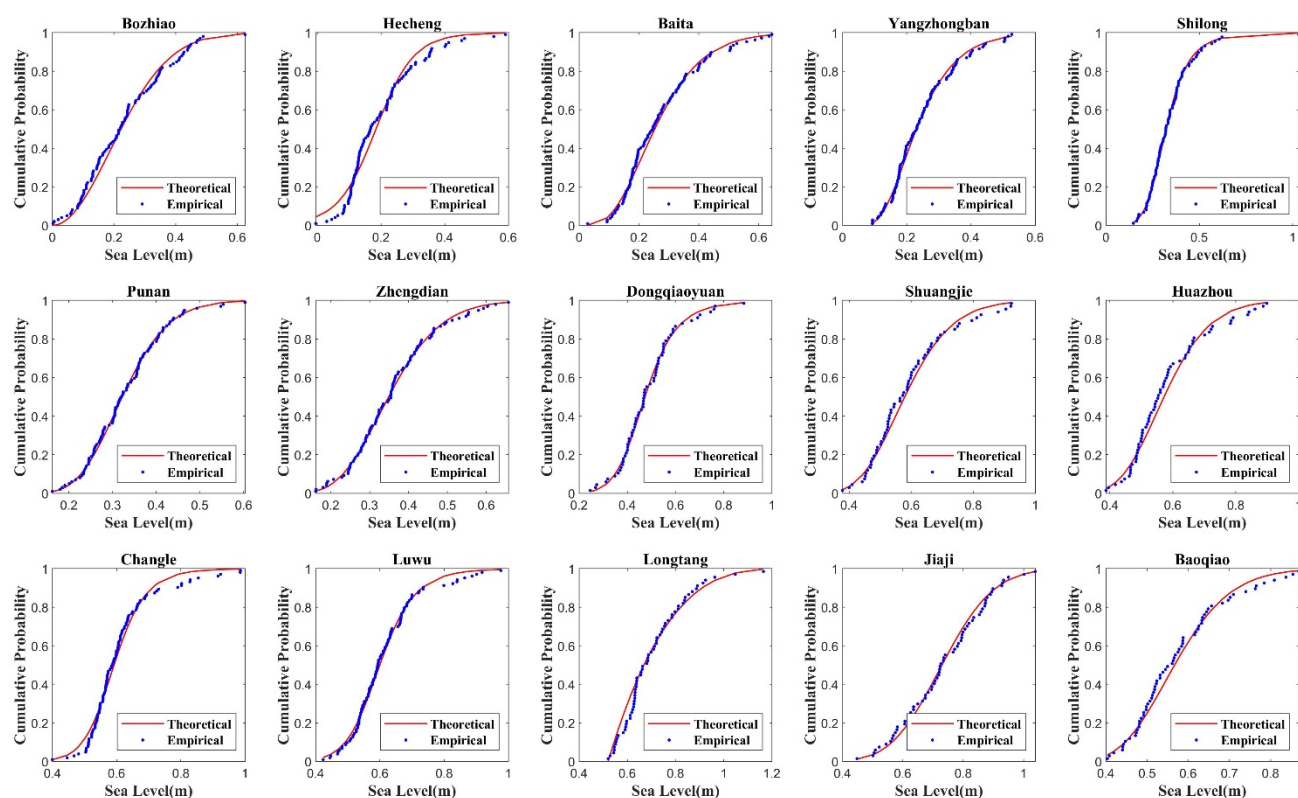

**Figure S2.** Empirical distribution functions (blue markers) and theoretical distribution function (red lines) of sea level.
